# Supplementary material for: A bifunctional catalyst based on Nb and V oxides over alumina: oxidative cleavage of crude glycerol to green formic acid
Source: Royal Society of Chemistry journal article supplement (doi:10.1039/d0nj00384k), 2020-01-01
Supplement: d0nj00384k1.pdf [file d0nj00384k1.pdf]

**Supplementary information: A bifunctional catalyst based on Nb and V oxides over alumina: oxidative cleavage of crude glycerol to green formic acid.**

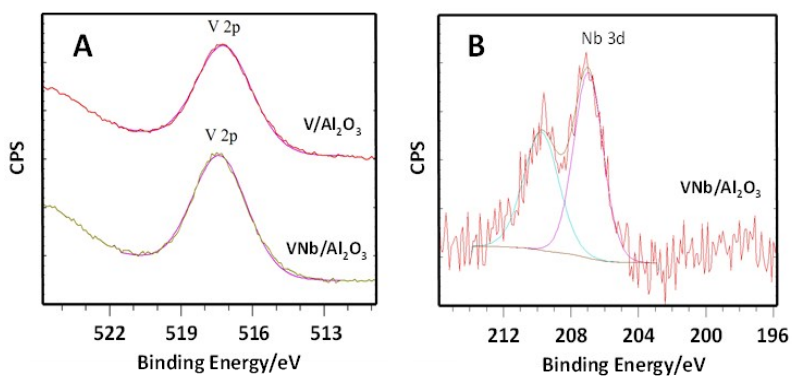

**Figure S1.** (A) V 2p and (B) Nb 3d XPS spectra of the V/Al<sub>2</sub>O<sub>3</sub> and VNb/Al<sub>2</sub>O<sub>3</sub> samples.

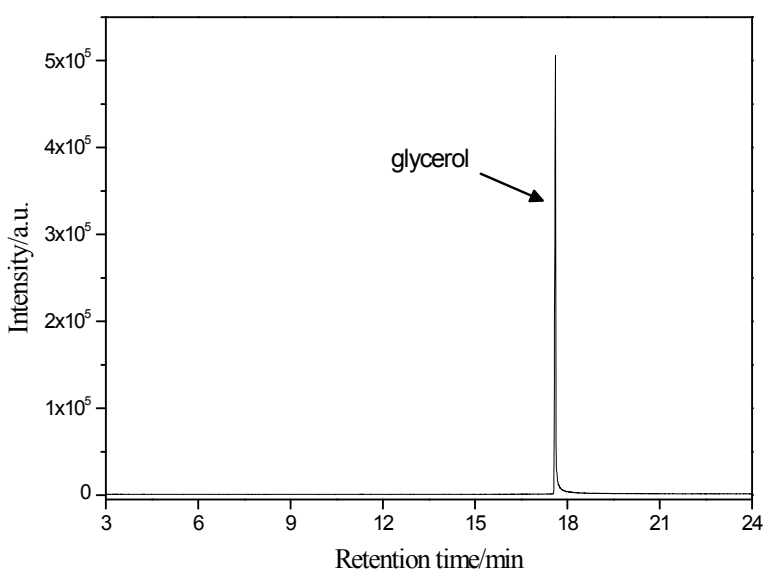

**Figure S2.** Waste glycerol chromatogram by GC-MS.

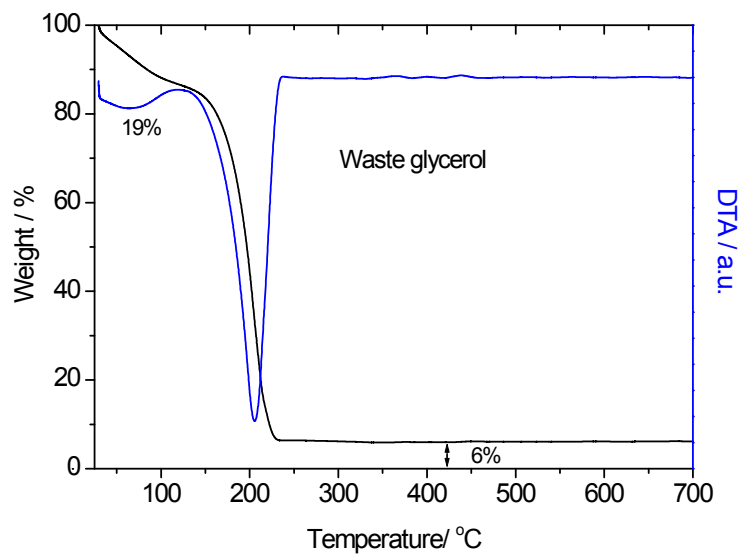

**Figure S3.** Thermogravimetric waste glycerol analysis under N<sub>2</sub> flow.
